# Supplementary material
Source: PubMed Central journal article supplement (PMC7484627)
Supplement: mmc1.pdf [file mmc1.pdf]

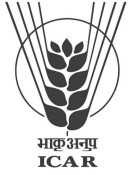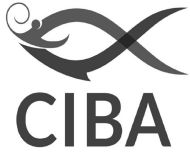

## COVID -19 Lockdown effect on Brackishwater Aquaculture sector

### Assessment of lockdown impact on brackishwater aquaculture activities

**Government of India exempted aquaculture related activities from lock down. However, stakeholders were reported several constraints in social media groups. Hence, ICAR - CIBA is trying to document the issues and constraints faced by the stakeholders of aquaculture sector through this survey. Your views would be useful in planning appropriate measures to ease the difficulties. Thank you for participating in our survey.**

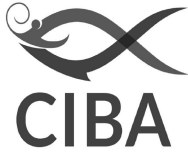

## COVID -19 Lockdown effect on Brackishwater Aquaculture sector

### Contact information of the respondent

#### \* 1. Please fill in your information

Name

Mobile number

email Id

District

#### \* 2. Choose your stakeholder type ( \*Person having more than one stakeholder role can submit multiple responses by selecting different stakeholder type after completing the survey for a specific stakeholder type)

Farmer

Farming Consultant / technician

Hatchery operator

Researcher

Processor

Others

Inputs retailer



## COVID -19 Lockdown effect on Brackishwater Aquaculture sector

### Concerns of the aquaculture farmer

3. What is the present stage of your crop

- Pre-stocking
- Phase I (1-30 days)
- Phase II (31-80 days)
- Phase III (above 80 days)

4. Do you aware that aquaculture related activities are exempted from Covid- 19 lockdown restrictions in India

- Yes
- No

5. Do you face difficulties to reach farms due to Lock down restrictions

- Yes
- No

6. Rate the difficulties faced by the farmers during the lock down period

|                                                           | Very difficult        | Difficult             | No issues             |
|-----------------------------------------------------------|-----------------------|-----------------------|-----------------------|
| Access to Seed                                            | <input type="radio"/> | <input type="radio"/> | <input type="radio"/> |
| Access to Feed                                            | <input type="radio"/> | <input type="radio"/> | <input type="radio"/> |
| Access to water<br>Kits/Minerals etc                      | <input type="radio"/> | <input type="radio"/> | <input type="radio"/> |
| Access to diagnostic<br>labs                              | <input type="radio"/> | <input type="radio"/> | <input type="radio"/> |
| Access to Fuel                                            | <input type="radio"/> | <input type="radio"/> | <input type="radio"/> |
| Access to Aerators/<br>Spare parts / pumping<br>machinery | <input type="radio"/> | <input type="radio"/> | <input type="radio"/> |
| Access to skilled<br>workers like electrician,<br>fishers | <input type="radio"/> | <input type="radio"/> | <input type="radio"/> |
| Access to technical<br>guidance                           | <input type="radio"/> | <input type="radio"/> | <input type="radio"/> |
| Access to<br>processor/market                             | <input type="radio"/> | <input type="radio"/> | <input type="radio"/> |
| Access to harvest and<br>post harvest materials           | <input type="radio"/> | <input type="radio"/> | <input type="radio"/> |
| Access to<br>transportation                               | <input type="radio"/> | <input type="radio"/> | <input type="radio"/> |

7. The lockdown restrictions will affect the indian seafood export performance to the tune of

- >10%
- 10-20%
- >20%

8. Do you aware that through CIBA shrimp app farmers can gen technical advise from ICAR-CIBA (download from Google playstore for free of cost)

- Yes
- No

9. Lockdown may impact the shrimp production by

- <20%
- 21-30%
- >30%

10. The lock down has increased the seed and other input cost was increased by

- <10%
- 10-30%
- >30%

11. Lock down has reduced the market price of the shrimp by

- <10 %
- 10-30 %
- >30 %

12. Lock down has negatively impact the employment to the tune of

- >10%
- 10-30%
- >30%

13. How much farming area is reduced due to lock down restrictions

- 5-10%
- 11-20%
- >20%

14. Do you feel that the guidelines & support provided by the Govt are grossly inadequate

- Yes
- No

15. Do you feel that due to the uncertain conditions and market prospects farmers could not take shrimp farming to the tune of

- 10-20%
- 21-30%
- >30%

16. The local authorities were not properly instructed to handle localised issues

- Agree
- Neither agree nor disagree
- Disagree

17. What are the other problems faced by shrimp farming sector during the lockdown period

Issue 1

Issue 2

Issue 3

Issue 4

18. What measures should have been taken by authorities to minimize the negative impact

Comment 1

Comment 2

Comment 3

Comment 4



## COVID -19 Lockdown effect on Brackishwater Aquaculture sector

### Concerns of the hatchery operators

19. Do you aware that aquaculture related activities are exempted from Covid- 19 lockdown restrictions in India

20. Rank the main concerns of hatchery during the lockdown

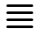

Man power shortage

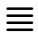

Lack of skilled employees

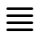

Inadequate supply of SPF broodstock

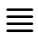

Lack of transportation facility

21. Lockdown may impact the shrimp production by

<20%

21-30%

>30%

22. Lock down has reduced the employment for workers to the tune of

10-20%

21-30%

>30%

23. Do you feel that the guidelines & support provided by the Govt are grossly inadequate

Yes

No

24. The local authorities were not properly instructed to handle localised issues

Agree

Neither agree nor disagree

Disagree

25. Do you think that the broodstock supply has been affected and supply of quality seed will be the major issue

Yes

No

26. Do you feel that due to the uncertain conditions and market prospects farmers could not take shrimp farming to the tune of

10-20%

21-30%

>30%

27. How much farming area is reduced due to lock down restrictions

5-10%

11-20%

>20%

28. Lock down has affected the sale of the shrimp seed to the tune of

< 20%

21 -30%

> 30%

29. Economic loss of the shrimp hatchery due to lock down to the tune of

< 20%

21 - 30%

> 30%



30. What are the other problems faced by shrimp farming sector during the lockdown period

Issue 1

Issue 2

Issue 3

Issue 4

31. What measures should have been taken by authorities to minimize the negative impact

Comment 1

Comment 2

Comment 3

Comment 4



## COVID -19 Lockdown effect on Brackishwater Aquaculture sector

### Concerns of the processor

32. Do you aware that aquaculture related activities are exempted from Covid- 19 lockdown restrictions in India

- Yes  
 No

33. Do you face difficulties to reach processing plants due to Lock down restrictions

- Yes  
 No

34. Lockdown may impact the shrimp production by

- <20%  
 21-30%  
 >30%

35. What are the main concerns in processing plants

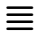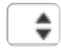

Man power shortage

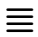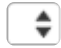

shortage in raw material

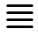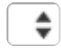

poor quality raw material

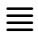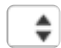

Non availability of bigger shrimps

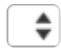

Lack of export orders

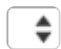

Inadequate storage capacity

36. The lock down has increased the seed and other input cost was increased by

- <10%
- 10-30%
- >30%

37. The lockdown restrictions will affect the indian seafood export performance to the tune of

- >10%
- 10-20%
- >20%

38. How much farming area is reduced due to lock down restrictions

- 5-10%
- 11-20%
- >20%

39. Do you feel that due to the uncertain conditions and market prospects farmers could not take shrimp farming to the tune of

- 10-20%
- 21-30%
- >30%

40. Lock down has reduced the employment for workers to the tune of

- 10-20%
- 21-30%
- >30%

41. Do you feel that the guidelines & support provided by the Govt are grossly inadequate

- Yes
- No

42. The local authorities were not properly instructed to handle localised issues

- Agree
- Neither agree nor disagree
- Disagree

43. What are the other problems faced by shrimp farming sector during the lockdown period

Issue 1

Issue 2

Issue 3

Issue 4

44. What measures should have been taken by authorities to minimize the negative impact

Comment 1

Comment 2

Comment 3

Comment 4
